# Supplementary material for: Highly-stable flexible pressure sensor using piezoelectric polymer film on metal oxide TFT
Source: Royal Society of Chemistry journal article supplement (doi:10.1039/d2ra02613a), 2022-01-01
Supplement: d2ra02613a1.pdf [file d2ra02613a1.pdf]

# **Highly-Stable Flexible Pressure Sensor Using Piezoelectric Polymer Film on Metal Oxide TFT**

**Taiyu Jin,<sup>a</sup> Sang-Hee Ko Park<sup>b</sup> and Da-Wei Fang<sup>\*a</sup>**

<sup>a</sup>Institute of Rare and Scattered Elements, College of Chemistry, Liaoning University, Shenyang 110036, P. R. China.

<sup>b</sup>Smart & Soft Materials & Devices Laboratory (SSMD), Department of Materials Science and Engineering, Korea Advanced Institute of Science and Technology (KAIST), Daejeon 34141, South Korea.

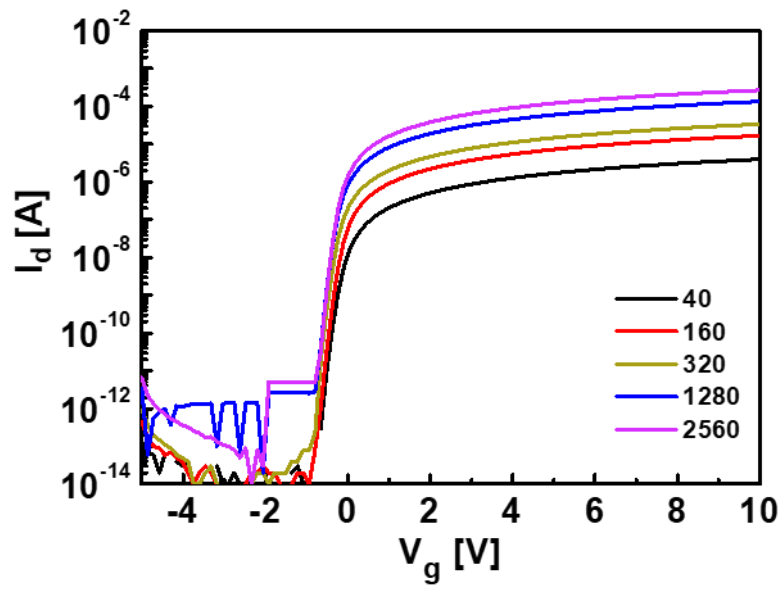

**Fig. S1** Transfer characteristics of a-IGZO TFTs with various active widths. The length of the TFT channel was fixed as 20  $\mu\text{m}$ , while the width of the TFT channel varies from 40  $\mu\text{m}$  to 2560  $\mu\text{m}$ .

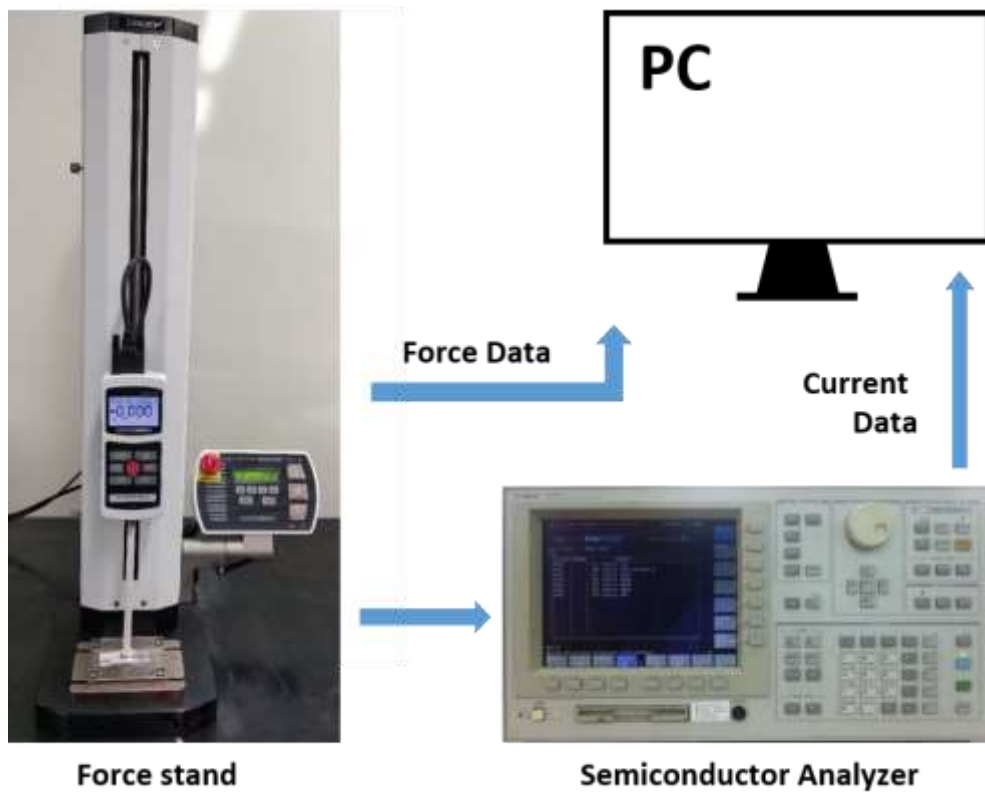

**Fig. S2** Measurement setup for the pressure sensor.

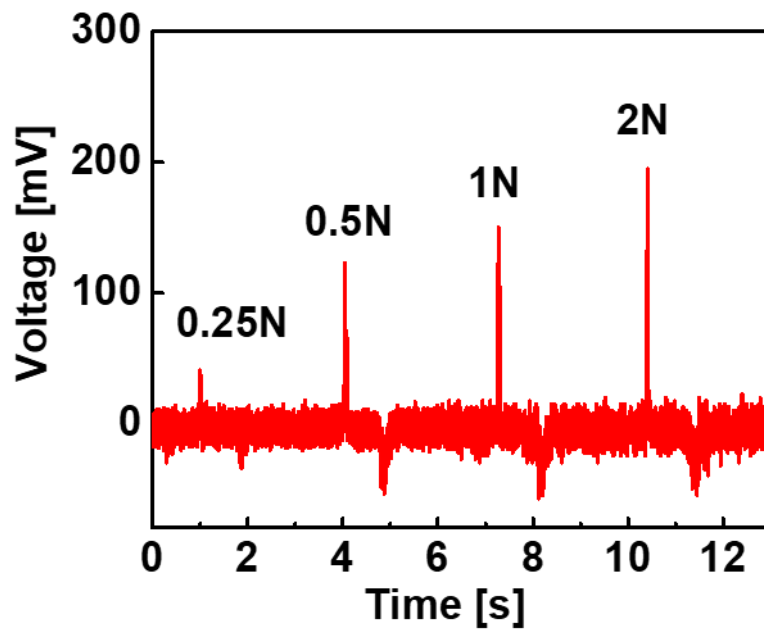

**Fig. S3** Voltage generated across the piezoelectric film when pressure is applied.

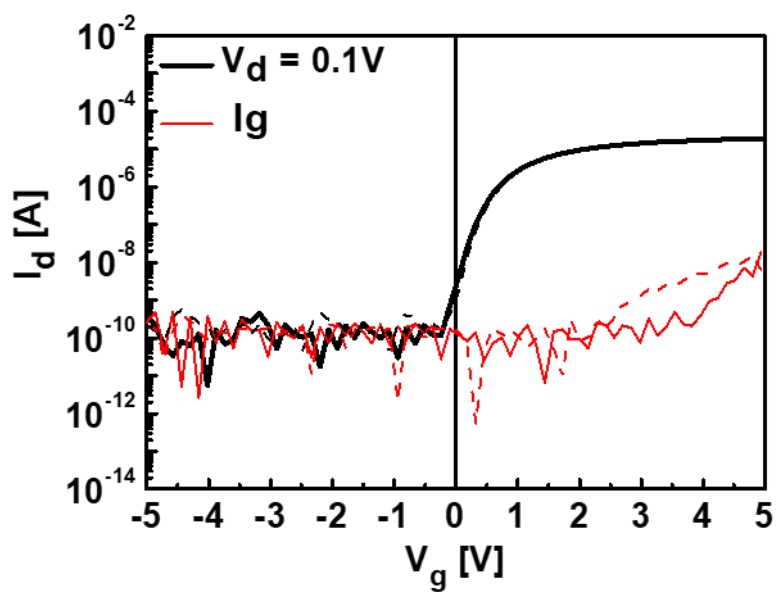

**Fig. S4** Transfer characteristics of a-IGZO TFT measured outside the electromagnetically isolated box.

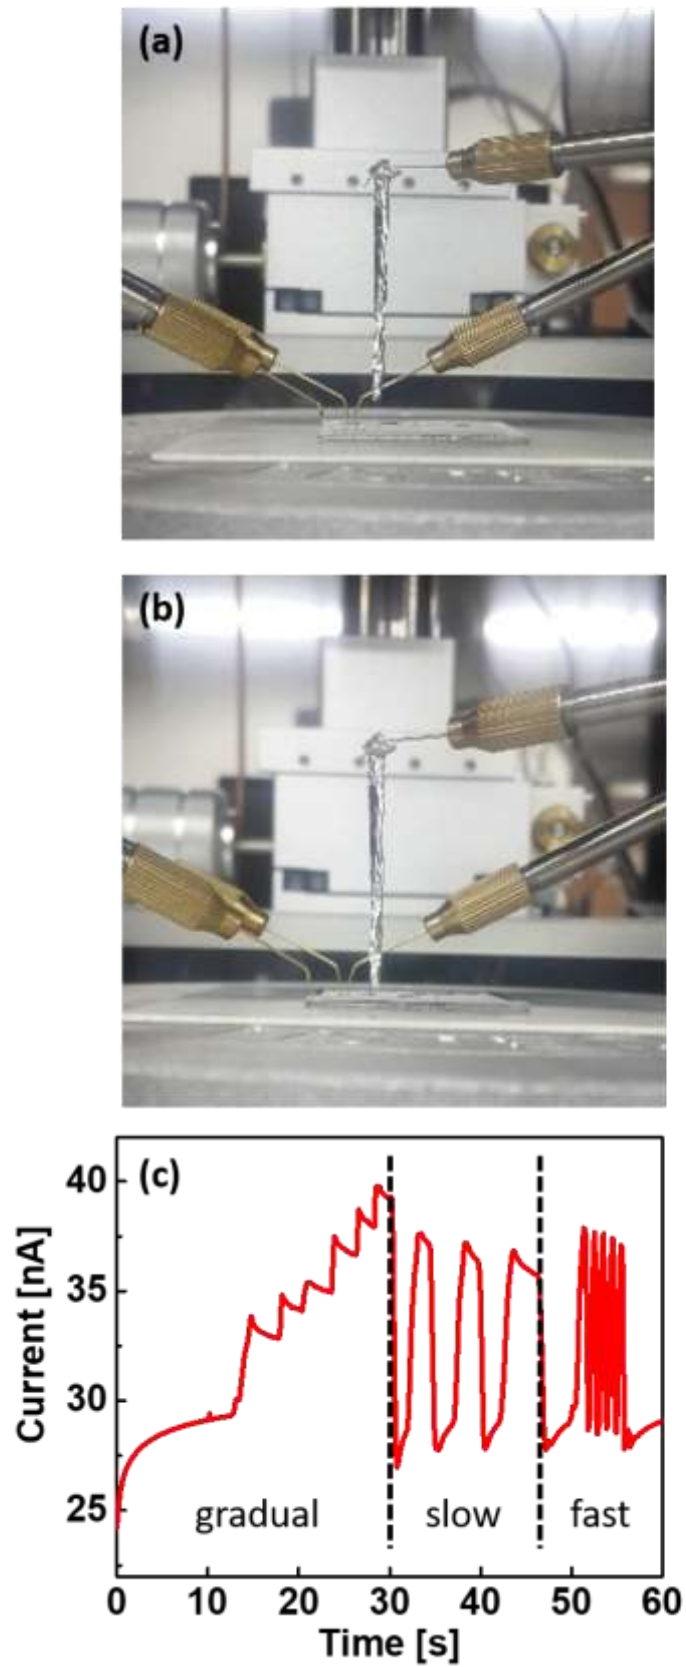

**Fig. S5** Photo images of a piece of debris (a) away and (b) close to the sensor. (c) Current response with a piece of debris gradually approaches, slowly approaches, and rapidly approaches to the sensor.

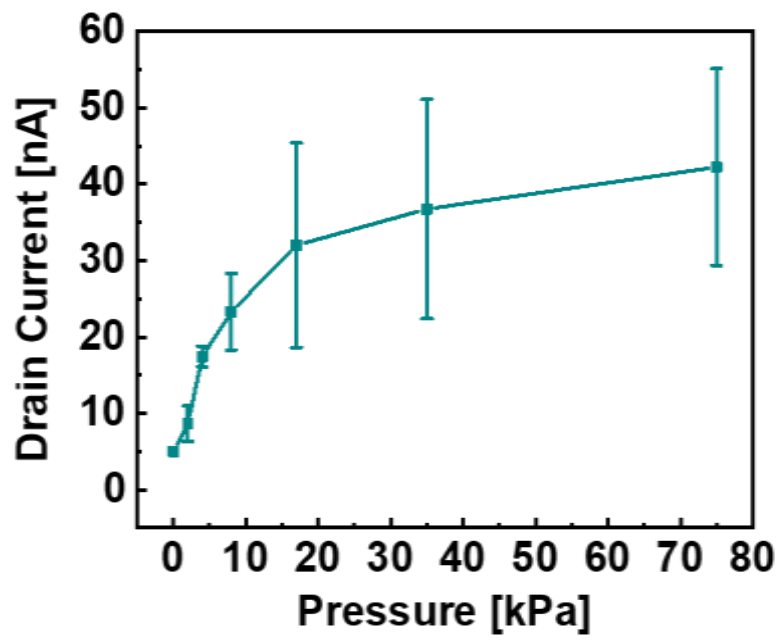

**Fig. S6** Current response with high-speed pressures applied to the sensor.
